# Supplementary material for: Spatial Metabolomics Reveals the Multifaceted Nature of Lamprey Buccal Gland and Its Diverse Mechanisms for Blood-Feeding
Source: Springer Nature journal article supplement (doi:10.1038/s42003-023-05250-x), 2023-08-28

**Spatial Metabolomics Reveals the Multifaceted Nature of Lamprey Buccal Gland and Its  
Diverse Mechanisms for Blood-Feeding**

Meng Gou<sup>1,2#</sup>, Xuyuan Duan<sup>1,2#</sup>, Jun Li<sup>1,2#</sup>, Yaocen Wang<sup>1,2</sup>, Qingwei Li<sup>1,2</sup>, Yue Pang<sup>1,2\*</sup>, Yonghui Dong<sup>3\*</sup>

<sup>1</sup>College of Life Science, Liaoning Normal University, Dalian 116081, China

<sup>2</sup>Lamprey Research Center, Liaoning Normal University, Dalian 116081, China

<sup>3</sup>Weizmann Institute of Science, Rehovot, Israel

# These authors contributed equally to this work

\*To whom correspondence may be addressed.

E-mail: [pangyue@lnnu.edu.cn](mailto:pangyue@lnnu.edu.cn); [yonghui.dong@weizmann.ac.il](mailto:yonghui.dong@weizmann.ac.il)

## Table of Content

1. Table S1. The optimal set of parameters for Compound Discoverer
2. Table S2. The optimal set of parameters for Progenesis QI
3. Table S3. The optimal set of parameters for MS-DIAL
4. Table S4. The primer sequences used in the study
5. Table S5. Putative kynurenine pathway metabolites and prostaglandins identified in the buccal gland of lamprey.
6. Fig. S1 Head-to-tail plot of experimental and library ESI-MS/MS spectra of tryptophan.
7. Fig. S2 Head-to-tail plot of experimental and library ESI-MS/MS spectra of L-kynurenine.
8. Fig. S3 Head-to-tail plot of experimental and library ESI-MS/MS spectra of L-kynurenic acid.
9. Fig. S4 Head-to-tail plot of experimental and library ESI-MS/MS spectra of 3-hydroxyanthranilic acid.
10. Fig. S5 Head-to-tail plot of experimental and library ESI-MS/MS spectra of xanthurenic acid.
11. Fig. S6 Head-to-tail plot of experimental and library ESI-MS/MS spectra of anthranillic acid.
12. Fig. S7 Head-to-tail plot of experimental and library ESI-MS/MS spectra of prostaglandin E2.
13. Fig. S8 Head-to-tail plot of experimental and library ESI-MS/MS spectra of prostaglandin E3.
14. Fig. S9 Head-to-tail plot of experimental and library ESI-MS/MS spectra of prostaglandin F2 $\alpha$ .
15. Fig. S10 Head-to-tail plot of experimental and library ESI-MS/MS spectra of prostaglandin J2.

Table S1. The optimal set of parameters for Compound Discoverer

| Parameter                               | Value    |
|-----------------------------------------|----------|
| Alignment/ RT tolerance (min)           | 2        |
| Select spectra/ min peak count          | 1        |
| Select spectra/ S/N threshold (FT-only) | 1.5      |
| Detect compound/ Intensity              | 1000,000 |
| Peak detection/ max peak width (min)    | 0.5      |
| Peak detection/ min scan per peak       | 3        |
| Gap filling/ S/N threshold              | 3        |
| Gap filling/ RT tolerance (min)         | 0.1      |

Table S2. The optimal set of parameters for Progenesis QI

| Parameter                               | Value    |
|-----------------------------------------|----------|
| Alignment/ RT tolerance (min)           | 2        |
| Select spectra/ min peak count          | 1        |
| Select spectra/ S/N threshold (FT-only) | 1.5      |
| Detect compound/ Intensity              | 1000,000 |
| Peak detection/ max peak width (min)    | 0.5      |
| Peak detection/ min scan per peak       | 3        |
| Gap filling/ S/N threshold              | 3        |
| Gap filling/ RT tolerance (min)         | 0.1      |

Table S3. The optimal set of parameters for MS-DIAL

| Parameter                       | Value   |
|---------------------------------|---------|
| Minimum peak width (scan)       | 5       |
| Minimum peak height (amplitude) | 100,000 |
| Mass slice width (Da)           | 0.1     |
| Sigma window value              | 0.5     |

Table S4. The primer sequences used in the study

| Gene name | Primer sequence (5'-3')     |
|-----------|-----------------------------|
| IDO F1    | CAAGGATTACAACATACACG        |
| IDO R1    | TCCACCCAGATAGGAAGAT         |
| IDO F2    | GGGCATCATTGGCTTGG           |
| IDO R2    | GAGATAGCCCTCTTTGAACT        |
| KMO F1    | CAGGATTTGCGAGCGGTCAT        |
| KMO R1    | GAAGGAGTGGTCGTTGTTGG        |
| KMO F2    | CACATTCCGACGCTCCA           |
| KMO R2    | TTGCGGAATAGGAACCAG          |
| KMO F3    | ACTGCTTGGTGTTTGATGAACTAATGG |
| KMO R3    | GGATGAGCCTCCTGGTATGT        |
| AADAT F1  | TCACACATCTTCAATCACAGGCGGG   |
| AADAT R1  | GGGTTACCACCATTGGGGACTGT     |
| AADAT F2  | TGGACACGCCAACATAACC         |
| AADAT R2  | TCTGTGAGAAGGTGGACGT         |
| AADAT F3  | ATCCGCACAGATTCCTTC          |
| AADAT R3  | GTGGGAAATTCTGGTTCTTGTTG     |
| TDO F1    | GGACTTGGACGATGGTTTG         |
| TDO R1    | GCAAGCCTCTTCCTCCAAC         |
| TDO F2    | GCGTGCCGTACAACAAG           |
| TDO R2    | GTTGAAGAGGTCCACGAA          |
| TDO F3    | TCAACAGCCTTATGGATCTCG       |
| TDO R3    | TGAACAGACCTACTACTCCAACA     |
| qIDO F    | CGAATGCGGGAGTACATGCTACC     |
| qIDO R    | GCGAAACAAAGTGGCGAATGGAG     |
| qKMO F    | CGACTTCTTCAGCCGATACTTCCC    |
| qKMO R    | AGAGCACTTGACCGAGACCAGAG     |
| qAADAT F  | CATCCCTGAGGTGATTGACTGGTTC   |
| qAADAT R  | ACGGTCATCTCGGTGTCTGTGG      |

qTDO F

GTGGACTTGGACGATGGTTTGGAG

qTDO R

TGGTGTTGTGATGCTTGGTGCTC

---

Table S5. Putative kynurenine pathway metabolites and prostaglandins identified in the buccal gland of lamprey.

| Name                                         | Elemental composition                                                  | Retention Time (min) | Theoretical m/z | Measured m/z | ppm   | Identification level |
|----------------------------------------------|------------------------------------------------------------------------|----------------------|-----------------|--------------|-------|----------------------|
| L-Tryptophan                                 | C <sub>11</sub> H <sub>12</sub> N <sub>2</sub> O <sub>2</sub>          | 4.09                 | 205.0971        | 205.0982     | 5.1   | 1                    |
| N-formylkynurenine                           | C <sub>11</sub> H <sub>12</sub> N <sub>2</sub> O <sub>4</sub>          | 2.22                 | 237.0870        | 237.0867     | -1.2  | 2                    |
| L-Kynurenine                                 | C <sub>10</sub> H <sub>12</sub> N <sub>2</sub> O <sub>3</sub>          | 5.57                 | 209.0921        | 209.0921     | 0     | 1                    |
| Kynurenic acid                               | <a href="#">C<sub>10</sub>H<sub>7</sub>NO<sub>3</sub></a>              | 4.48                 | 190.0499        | 190.0497     | -0.9  | 2                    |
| 3-Hydroxykynurenine                          | <a href="#">C<sub>10</sub>H<sub>12</sub>N<sub>2</sub>O<sub>4</sub></a> | 2.60                 | 225.0870        | 225.0869     | -0.37 | 2                    |
| Anthranilic acid                             | <a href="#">C<sub>7</sub>H<sub>7</sub>NO<sub>2</sub></a>               | 2.93                 | 138.055         | 138.055      | 0     | 2                    |
| Quinolinic acid                              | <a href="#">C<sub>7</sub>H<sub>5</sub>NO<sub>4</sub></a>               | 0.78                 | 166.0146        | 166.0144     | -1.1  | 2                    |
| Xanthurenic acid                             | <a href="#">C<sub>10</sub>H<sub>7</sub>NO<sub>4</sub></a>              | 4.23                 | 206.0448        | 206.0447     | -0.41 | 2                    |
| 3-Hydroxyanthranilic acid                    | <a href="#">C<sub>7</sub>H<sub>7</sub>NO<sub>3</sub></a>               | 3.33                 | 154.0499        | 154.0498     | -0.45 | 2                    |
| L-3-hydroxykynurenine-O-sulfate <sub>2</sub> | C <sub>10</sub> H <sub>12</sub> O <sub>7</sub> N <sub>2</sub> S        | 1.29                 | 303.0292        | 303.0291     | -0.49 | 2                    |
| Prostaglandin F <sub>2α</sub>                | <a href="#">C<sub>20</sub>H<sub>34</sub>O<sub>5</sub></a>              | 7.58                 | 353.2333        | 353.2333     | 0     | 2                    |
| Prostaglandin J <sub>2</sub>                 | <a href="#">C<sub>20</sub>H<sub>30</sub>O<sub>4</sub></a>              | 9.55                 | 333.2071        | 333.2057     | -4.2  | 2                    |
| Prostaglandin E <sub>2</sub>                 | <a href="#">C<sub>20</sub>H<sub>32</sub>O<sub>5</sub></a>              | 7.66                 | 351.2177        | 351.2162     | -4.27 | 2                    |
| Prostaglandin E <sub>3</sub>                 | <a href="#">C<sub>20</sub>H<sub>30</sub>O<sub>5</sub></a>              | 7.60                 | 349.2020        | 349.2020     | 0     | 2                    |



**Note:**

1. Metabolite identification confidence level for each identified metabolite in this study was assigned following the modified four-level classification scheme from the Metabolomics Standards Initiative<sup>1</sup>: **Level 1.** Validated Identification based on reference standard, with MS, MS/MS and retention time matching. **Level 2.** Putative identification based on matching fragmentation data to metabolite MS/MS libraries. **Level 3.** Tentative structures match precursor  $m/z$  to a metabolite database. **Level 4.** Unique molecular formula determined based on isotope abundance distribution, charge state and adduct ion determination.
2. The MS/MS spectrum of the metabolites are shown in Figure S1 and S10.
3. The Elemental composition, retention time, theoretical  $m/z$ , measured  $m/z$ , fragments, and chemical structure of other metabolites can be found in <https://www.lampreydb.com>.

Fig. S1 Head-to-tail plot of experimental and library ESI-MS/MS spectra of tryptophan.

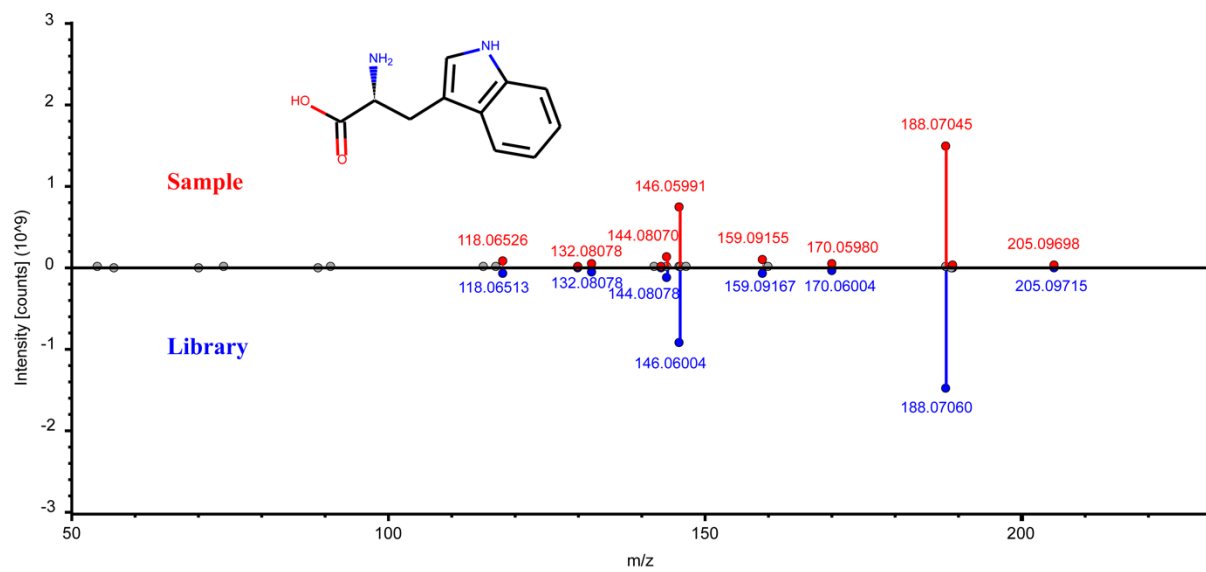

Fig. S2 Head-to-tail plot of experimental and library ESI-MS/MS spectra of L-kynurenine.

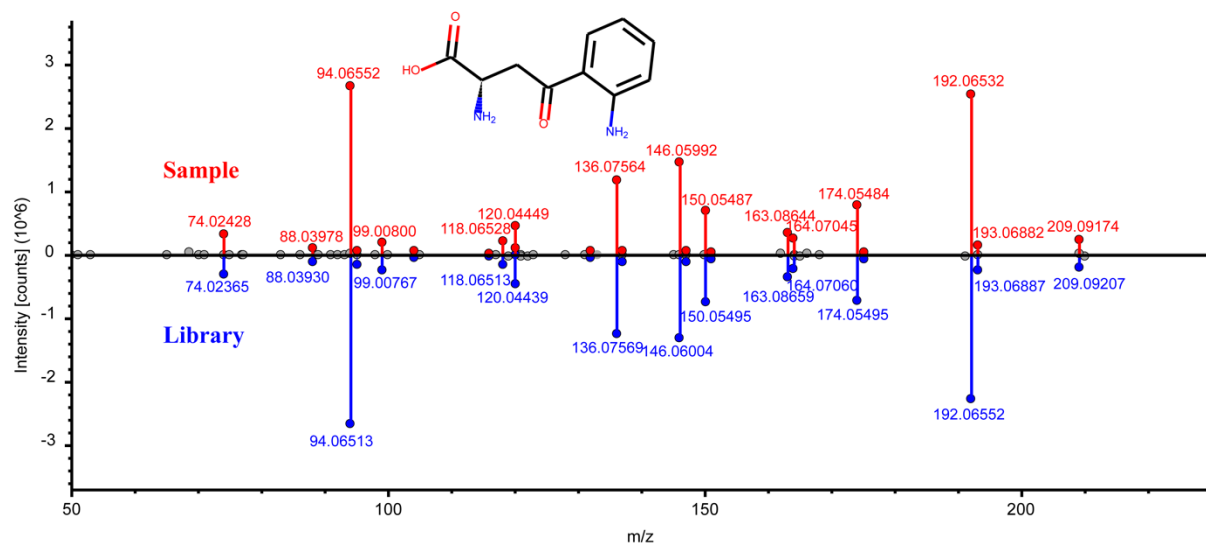

Fig. S3 Head-to-tail plot of experimental and library ESI-MS/MS spectra of L-kynurenic acid.

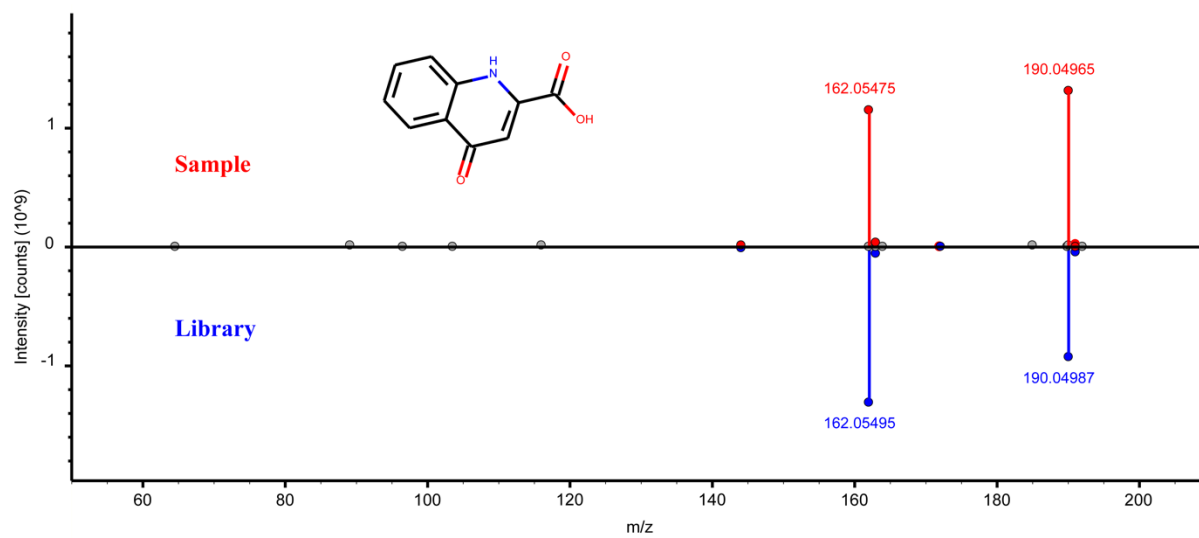

Fig. S4 Head-to-tail plot of experimental and library ESI-MS/MS spectra of 3-hydroxyanthranilic acid.

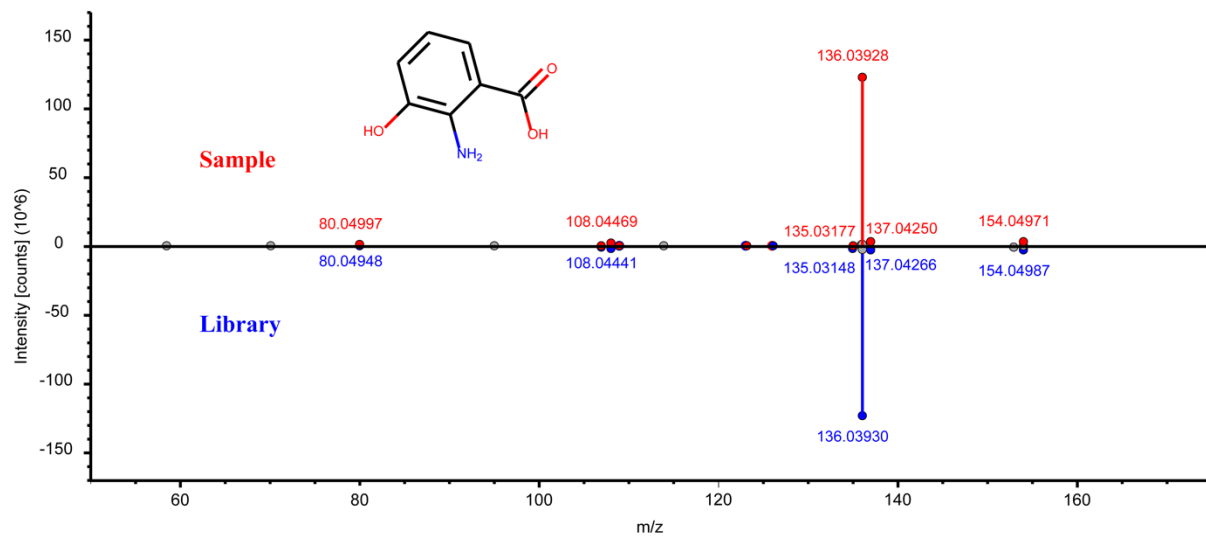

Fig. S5 Head-to-tail plot of experimental and library ESI-MS/MS spectra of xanthurenic acid.

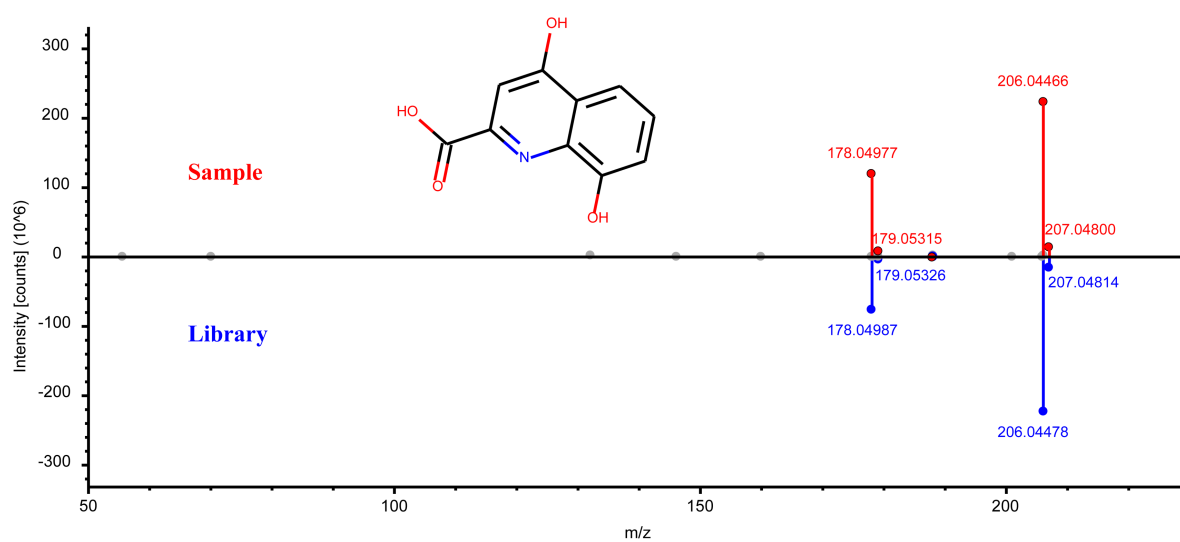

Fig. S6 Head-to-tail plot of experimental and library ESI-MS/MS spectra of anthranilic acid.

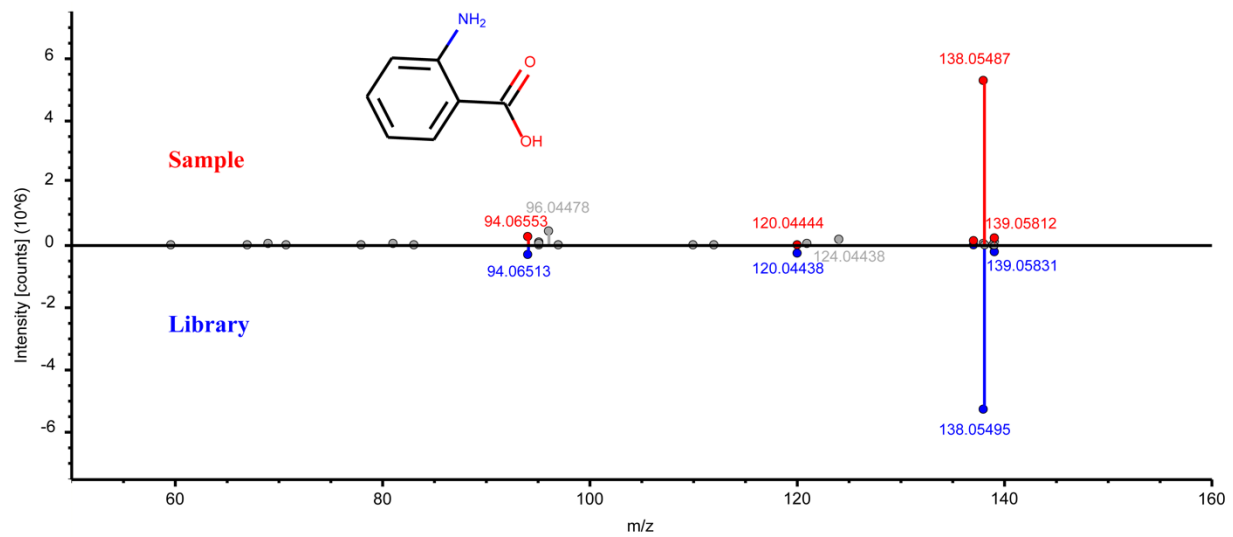

Fig. S7 Head-to-tail plot of experimental and library ESI-MS/MS spectra of prostaglandin E2.

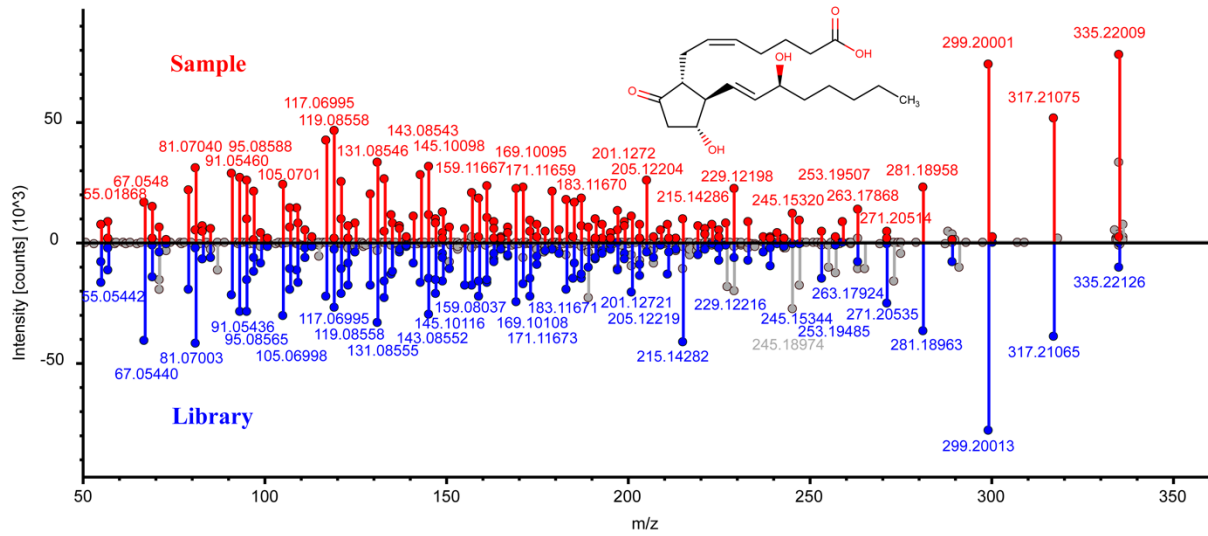



Fig. S8 Head-to-tail plot of experimental and library ESI-MS/MS spectra of prostaglandin E3.

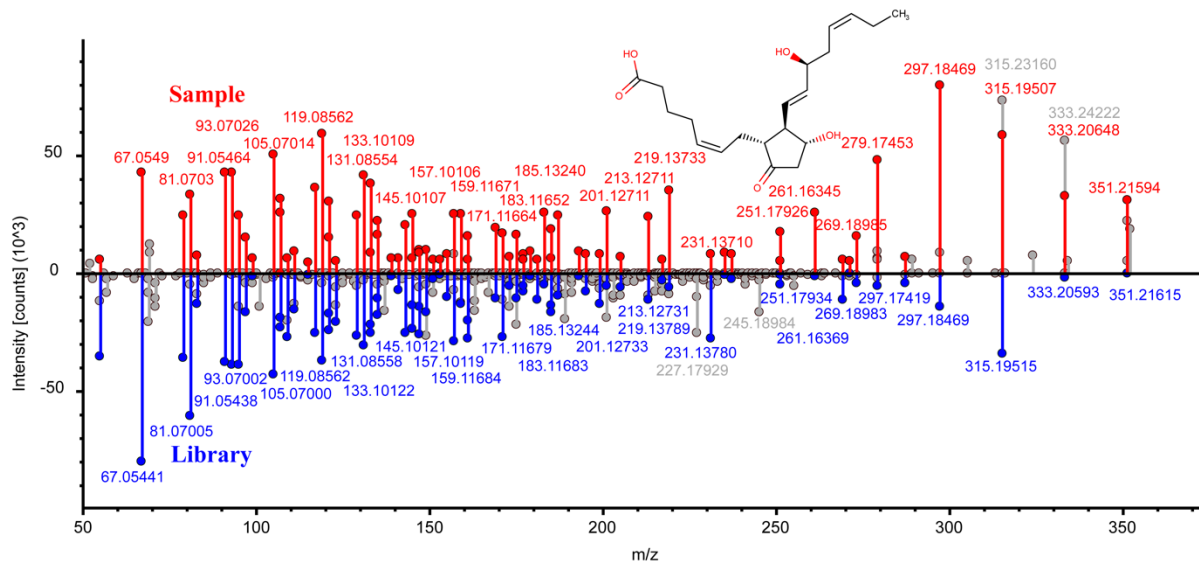

Fig. S9 Head-to-tail plot of experimental and library ESI-MS/MS spectra of prostaglandin F2 $\alpha$ .

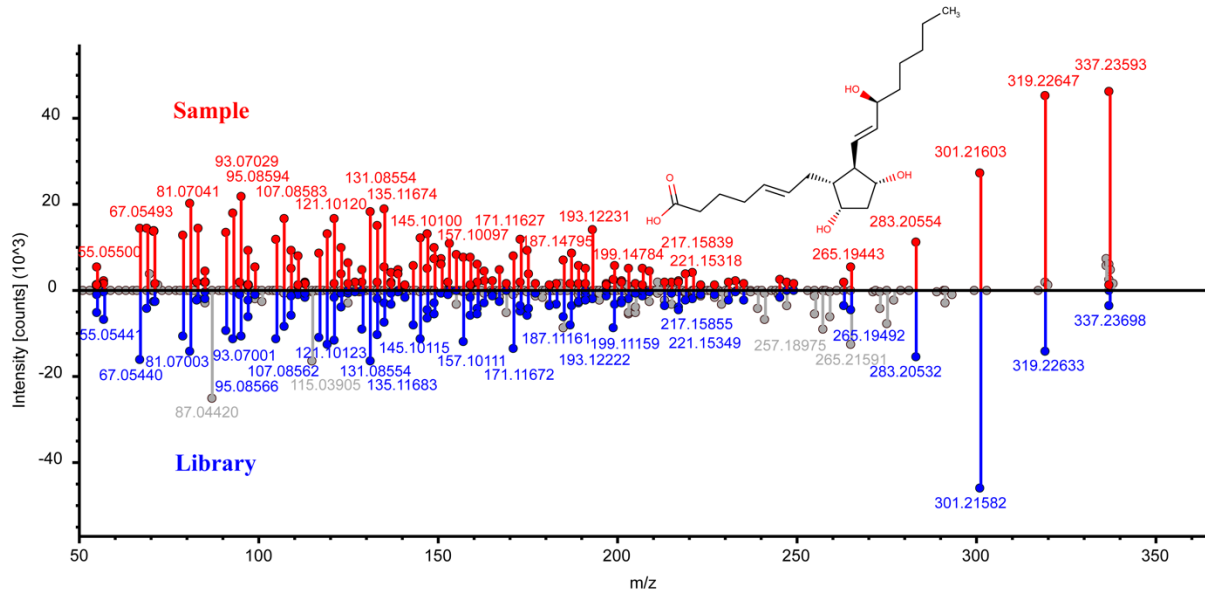

Fig. S10 Head-to-tail plot of experimental and library ESI-MS/MS spectra of prostaglandin J2.

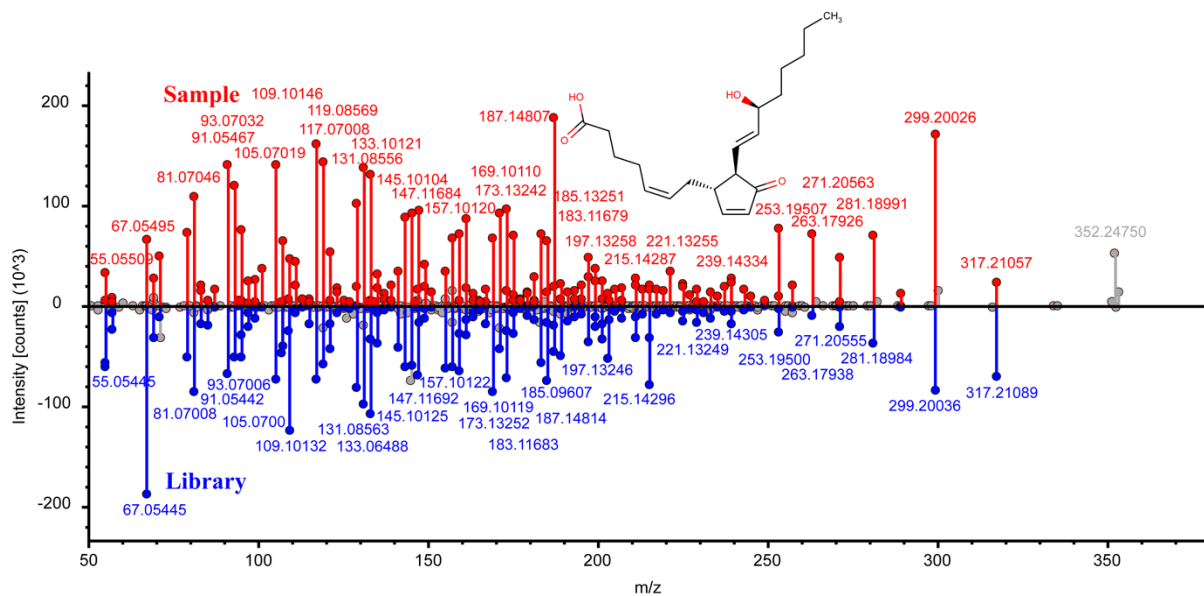

Fig. S11 Experimental design for lamprey blood-sucking. **a**, Five groups of lampreys were used for blood-sucking experiment. Group 1 is the buccal gland collected from lampreys before blood-sucking; Group 2 is the feeding-site from the host fish (catfish); Groups 3 and 4 are non-feeding sites from the host fish; and group 5 is the buccal glands collected from lampreys after blood-sucking. **b**, Principal component analysis (PCA) score plots of the metabolic profiles of the 5 sample groups (n = 3 for each group). **c-e**, Measurement of relative peak areas of anthranilic acid (**c**), 3-hydroxyanthranilic acid (**d**), xanthurenic acid (**e**). The data are shown as the mean  $\pm$  SD (n = 3). Asterisks denote significant differences (ns, not significant; \*, p < 0.05; \*\*, p < 0.01).

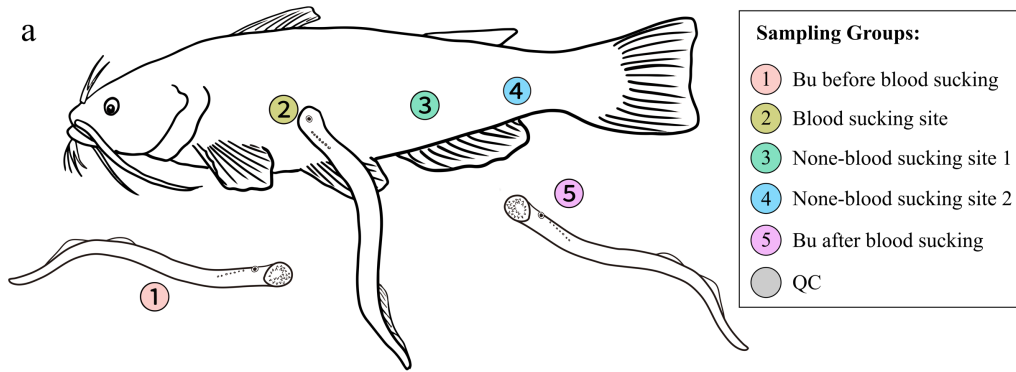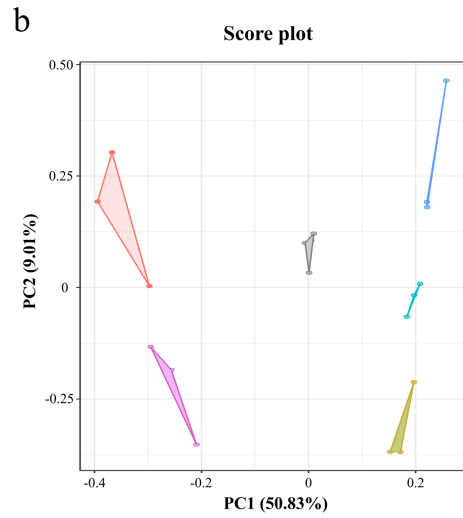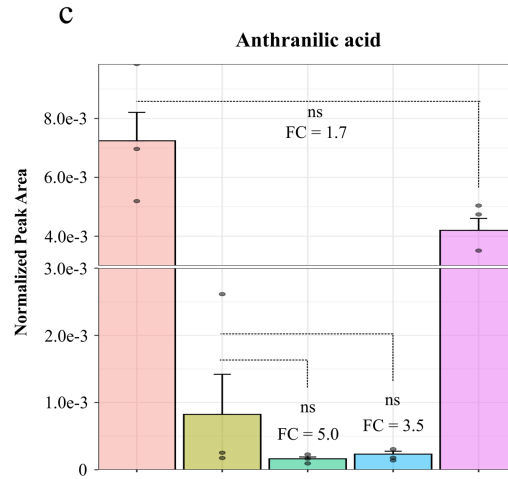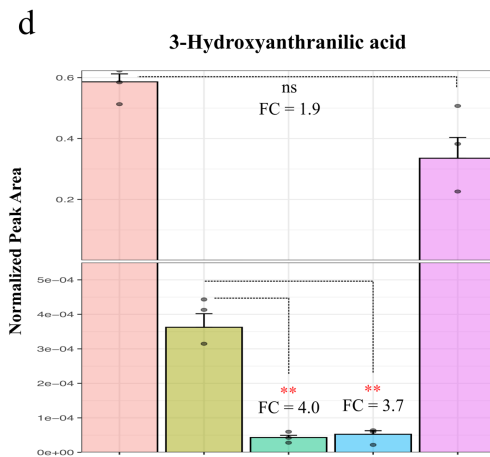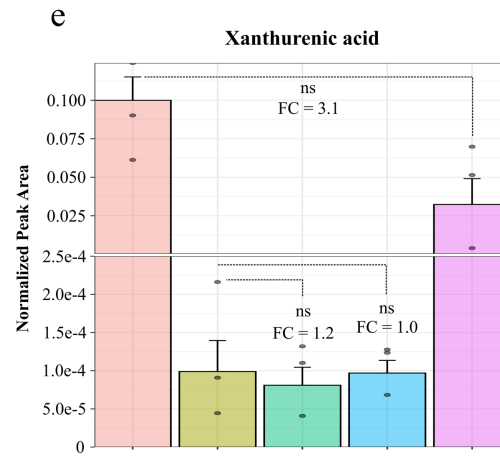

Fig. S12 Identification of arachidonic acid in lampreys. **a**, Head-to-tail plot of experimental and library ESI-MS/MS spectra of arachidonic acid. **b**, Spatial distribution of arachidonic acid in lampreys.

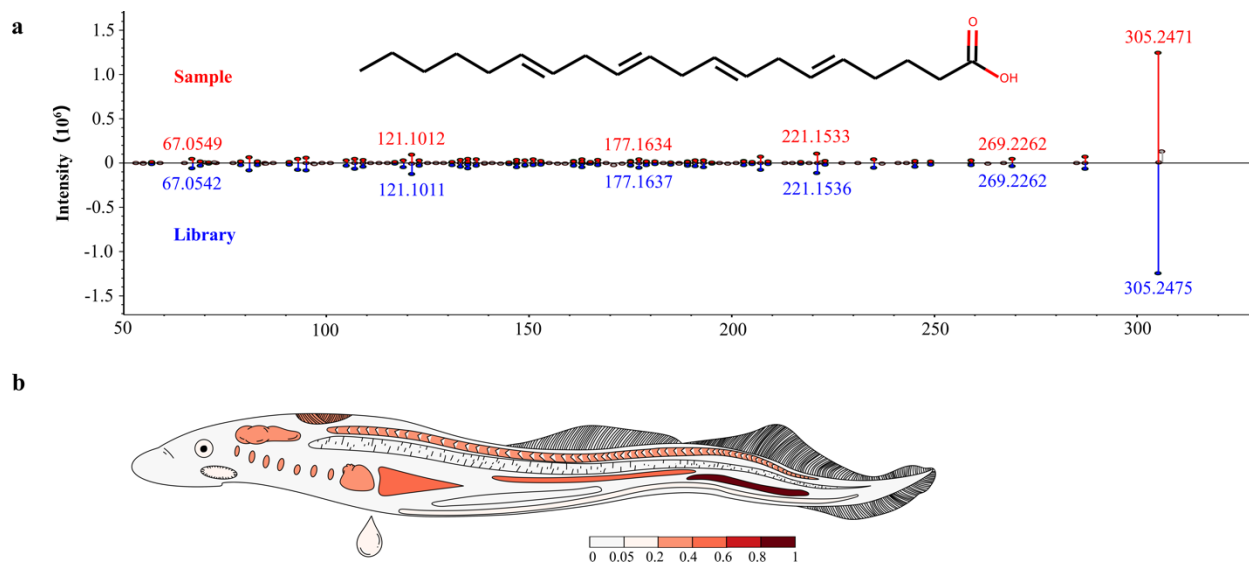

Fig. S13 Identification of petromyzonol sulfate in lampreys. **a**, Head-to-tail plot of experimental and library ESI-MS/MS spectra of petromyzonol sulfate. **b**, Spatial distribution of petromyzonol sulfate in lampreys.

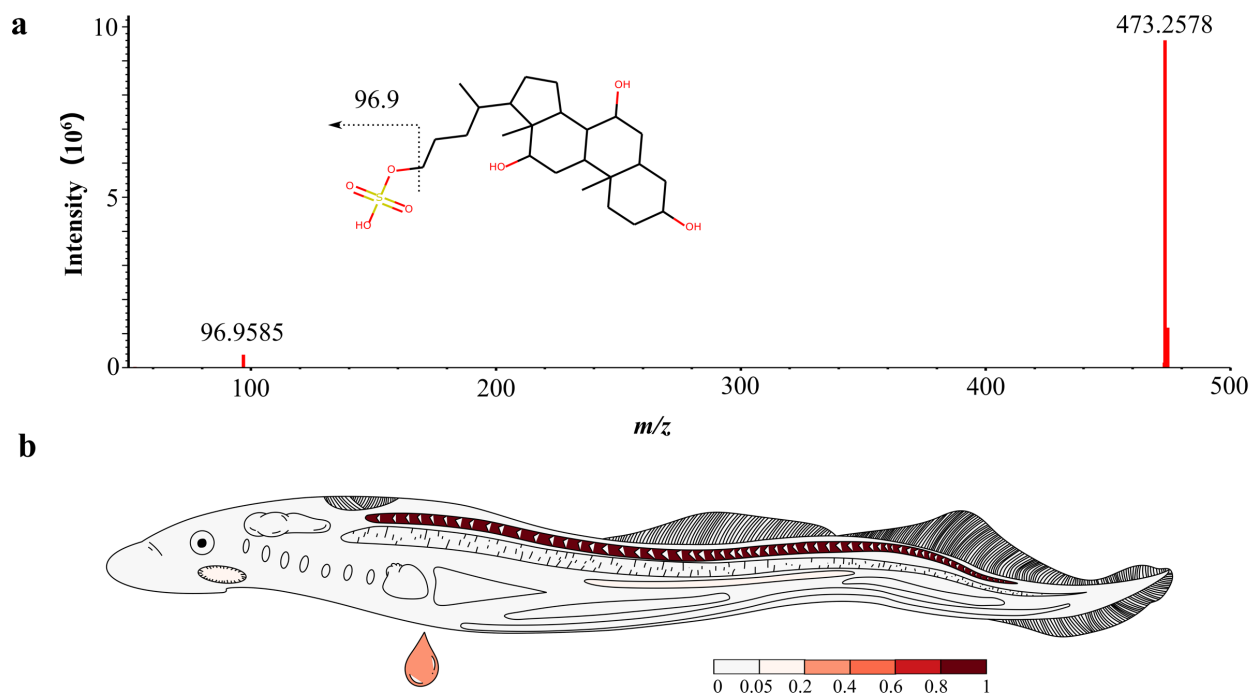

Supplement: 42003_2023_5250_MOESM1_ESM.pdf [file 42003_2023_5250_MOESM1_ESM.pdf]
