# Supplementary material for: Spatial Metabolomics Reveals the Multifaceted Nature of Lamprey Buccal Gland and Its Diverse Mechanisms for Blood-Feeding
Source: Springer Nature journal article supplement (doi:10.1038/s42003-023-05250-x), 2023-08-28
Supplement: 42003_2023_5250_MOESM2_ESM.pdf [file 42003_2023_5250_MOESM2_ESM.pdf]

## **Description of Additional Supplementary Files**

**File name:** Supplementary Data 1

**Description:** Quality control report for LCMS data obtained at positive ion mode.

**File name:** Supplementary Data 2

**Description:** Quality control report for LCMS data obtained at negative ion mode.
